# Supplementary material
Source: Elsevier journal article supplement (https://cris.unibo.it/retrieve/f8b18b9a-b0f1-4303-88d8-96fb83c7da31/mmc1.pdf)
Supplement: mmc1 [file mmc1.pdf]

**Online Supplementary Material for Mateos et al. Daratumumab plus bortezomib, melphalan, and prednisone versus bortezomib, melphalan, and prednisone in transplant-ineligible newly diagnosed multiple myeloma: frailty subgroup analysis of ALCYONE.**

*This file provides supplementary results to expand on results provided in the main article.*

**Supplementary Table 1. Frailty Assessment Based on the FIRST Study<sup>1</sup>**

| Category                   | Score |
|----------------------------|-------|
| Age                        |       |
| ≤75 years                  | 0     |
| 76-80 years                | 1     |
| >80 years                  | 2     |
| Charlson Comorbidity Index |       |
| ≤1                         | 0     |
| >1                         | 1     |
| ECOG PS score              |       |
| 0                          | 0     |
| 1                          | 1     |
| ≥2                         | 2     |
| Sum of scores              |       |
| Fit                        | 0     |
| Intermediate               | 1     |
| Non-frail                  | 0-1   |
| Frail                      | ≥2    |

ECOG PS = Eastern Cooperative Oncology Group performance status.

This table was adapted from Table 1 from Facon T, et al. A simplified frailty scale predicts outcomes in transplant-ineligible patients with newly diagnosed multiple myeloma treated in the FIRST (MM-020) trial. *Leukemia*. 2020;34:224-233. <https://doi.org/10.1038/s41375-019-0539-0>, which is licensed under the Creative Commons Attribution 4.0 International License (<http://creativecommons.org/licenses/by/4.0/>).

**Supplementary Table 2. Patient Disposition for Cycle 10+ (Safety Population)<sup>a</sup>**

|                                             | <b>Non-frail<sup>b</sup></b>                   |                                                 |                                                 | <b>Frail</b>                                    |
|---------------------------------------------|------------------------------------------------|-------------------------------------------------|-------------------------------------------------|-------------------------------------------------|
|                                             | <b>Fit</b>                                     | <b>Intermediate</b>                             | <b>Total–non-frail<sup>b</sup></b>              | <b>Frail</b>                                    |
|                                             | <b>D-VMP<br/>(16.5%;<sup>c</sup> n=46/278)</b> | <b>D-VMP<br/>(42.4%;<sup>c</sup> n=118/278)</b> | <b>D-VMP<br/>(59.0%;<sup>c</sup> n=164/278)</b> | <b>D-VMP<br/>(41.0%;<sup>c</sup> n=114/278)</b> |
| Patients who discontinued treatment, n (%)  | 19 (41.3)                                      | 53 (44.9)                                       | 72 (43.9)                                       | 60 (52.6)                                       |
| Reason for discontinuation, n (%)           |                                                |                                                 |                                                 |                                                 |
| Progressive disease                         | 19 (41.3)                                      | 43 (36.4)                                       | 62 (37.8)                                       | 43 (37.7)                                       |
| Adverse event                               | 0                                              | 4 (3.4)                                         | 4 (2.4)                                         | 3 (2.6)                                         |
| Non-compliance with study drug <sup>d</sup> | 0                                              | 1 (0.8)                                         | 1 (0.6)                                         | 3 (2.6)                                         |
| Death                                       | 0                                              | 3 (2.5)                                         | 3 (1.8)                                         | 7 (6.1)                                         |
| Physician decision                          | 0                                              | 1 (0.8)                                         | 1 (0.6)                                         | 0                                               |
| Patient withdrawal                          | 0                                              | 0                                               | 0                                               | 3 (2.6)                                         |
| Other                                       | 0                                              | 1 (0.8)                                         | 1 (0.6)                                         | 1 (0.9)                                         |

D-VMP = daratumumab plus bortezomib/melphalan/prednisone.

<sup>a</sup>Percentages in the table were calculated using the number of patients in each frailty subgroup who entered Cycle 10 (fit, n=46; intermediate, n=118; total–non-frail, n=164; frail, n=114) as the denominator, unless otherwise indicated.

<sup>b</sup>Non-frail subgroup consists of fit and intermediate patients.

<sup>c</sup>Percentage was calculated using the number of patients in the D-VMP cohort who entered Cycle 10 as the denominator.

<sup>d</sup>Based on reason “Patient refused further study treatment.”

**Supplementary Table 3. Summary of Relative Dose Intensity (Safety Population)<sup>a</sup>**

|                                                  | Non-frail <sup>b</sup>                     |                                          |                                                 |                                           |                                                                 |                                           | Frail                                       |                                           |
|--------------------------------------------------|--------------------------------------------|------------------------------------------|-------------------------------------------------|-------------------------------------------|-----------------------------------------------------------------|-------------------------------------------|---------------------------------------------|-------------------------------------------|
|                                                  | Fit<br>(17.4%; <sup>c</sup> n=122/700)     |                                          | Intermediate<br>(38.1%; <sup>c</sup> n=267/700) |                                           | Total–non-frail <sup>b</sup><br>(55.6%; <sup>c</sup> n=389/700) |                                           | Frail<br>(44.4%; <sup>c</sup> n=311/700)    |                                           |
|                                                  | D-VMP<br>(13.9%; <sup>d</sup><br>n=48/346) | VMP<br>(20.9%; <sup>c</sup><br>n=74/354) | D-VMP<br>(39.9%; <sup>d</sup><br>n=138/346)     | VMP<br>(36.4%; <sup>c</sup><br>n=129/354) | D-VMP<br>(53.8%; <sup>d</sup><br>n=186/346)                     | VMP<br>(57.3%; <sup>c</sup><br>n=203/354) | D-VMP<br>(46.2%; <sup>d</sup><br>n=160/346) | VMP<br>(42.7%; <sup>c</sup><br>n=151/354) |
| Bortezomib relative dose intensity, %            |                                            |                                          |                                                 |                                           |                                                                 |                                           |                                             |                                           |
| N                                                | 48                                         | 74                                       | 138                                             | 129                                       | 186                                                             | 203                                       | 159                                         | 151                                       |
| Mean (SD)                                        | 91.2 (12.2)                                | 89.3 (13.0)                              | 88.0 (15.5)                                     | 89.5 (13.0)                               | 88.80 (14.8)                                                    | 89.5 (13.0)                               | 87.7 (16.5)                                 | 87.3 (14.9)                               |
| Median (range)                                   | 96.8 (54.1-103.2)                          | 95.6 (58.0-105.8)                        | 95.6 (33.8-103.6)                               | 95.0 (36.2-103.9)                         | 95.7 (33.8-103.6)                                               | 95.1 (36.2-105.8)                         | 95.3 (12.1-106.3)                           | 92.7 (26.2-110.6)                         |
| Melphalan relative dose intensity, %             |                                            |                                          |                                                 |                                           |                                                                 |                                           |                                             |                                           |
| N                                                | 48                                         | 74                                       | 137                                             | 129                                       | 185                                                             | 203                                       | 159                                         | 150                                       |
| Mean (SD)                                        | 93.3 (9.7)                                 | 93.9 (10.9)                              | 95.1 (9.8)                                      | 94.1 (11.4)                               | 94.6 (9.8)                                                      | 94.0 (11.2)                               | 91.0 (15.1)                                 | 91.3 (13.8)                               |
| Median (range)                                   | 94.8 (70.1-106.8)                          | 96.8 (49.9-119.6)                        | 97.7 (57.9-142.5)                               | 97.2 (37.2-108.1)                         | 97.4 (57.9-142.5)                                               | 97.1 (37.2-119.6)                         | 95.9 (25.0-136.9)                           | 95.4 (44.4-107.8)                         |
| Prednisone-equivalent relative dose intensity, % |                                            |                                          |                                                 |                                           |                                                                 |                                           |                                             |                                           |
| N                                                | 48                                         | 74                                       | 138                                             | 129                                       | 186                                                             | 203                                       | 160                                         | 150                                       |
| Mean (SD)                                        | 98.9 (3.5)                                 | 97.6 (5.8)                               | 97.4 (8.8)                                      | 96.4 (10.0)                               | 97.8 (7.8)                                                      | 96.8 (8.7)                                | 96.9 (10.2)                                 | 97.2 (7.0)                                |
| Median (range)                                   | 99.2 (90.8-110.0)                          | 99.0 (61.0-104.0)                        | 99.0 (24.4-108.9)                               | 98.8 (35.3-106.5)                         | 99.1 (24.4-110.0)                                               | 98.8 (35.3-106.5)                         | 99.0 (30.1-129.8)                           | 98.9 (53.7-106.3)                         |
| Daratumumab relative dose intensity, %           |                                            |                                          |                                                 |                                           |                                                                 |                                           |                                             |                                           |
| N                                                | 48                                         |                                          | 138                                             |                                           | 186                                                             |                                           | 160                                         |                                           |
| Mean (SD)                                        | 98.2 (5.0)                                 | –                                        | 94.9 (14.3)                                     | –                                         | 95.7 (12.6)                                                     | –                                         | 92.3 (19.5)                                 | –                                         |
| Median (range)                                   | 99.4 (70.6-105.4)                          | –                                        | 99.3 (6.9-106.2)                                | –                                         | 99.3 (6.9-106.2)                                                | –                                         | 98.5 (1.3-105.9)                            | –                                         |

D-VMP = daratumumab plus bortezomib/melphalan/prednisone; SD = standard deviation; VMP = bortezomib/melphalan/prednisone.

<sup>a</sup>Percentages in the table were calculated using the number of patients in each treatment cohort per frailty subgroup of the safety population (fit: D-VMP, n=48; VMP, n=74; intermediate: D-VMP, n=138; VMP, n=129; total–non-frail: D-VMP, n=186; VMP, n=203; frail: D-VMP; n=160; VMP, n=151) as the denominator, unless otherwise indicated.

<sup>b</sup>Non-frail subgroup consists of fit and intermediate patients.

<sup>c</sup>Percentage was calculated using the number of patients in the safety population as the denominator.

<sup>d</sup>Percentage was calculated using the number of patients in the D-VMP cohort of the safety population as the denominator.

<sup>e</sup>Percentage was calculated using the number of patients in the VMP cohort of the safety population as the denominator.

**Supplementary Table 4. Response and MRD-negativity Rates (ITT Population)<sup>a</sup>**

|                                            | Non-frail <sup>b</sup>                     |                                          |                |                                                 |                                           |                |                                                                 |                                           |                | Frail                                       |                                           |                |
|--------------------------------------------|--------------------------------------------|------------------------------------------|----------------|-------------------------------------------------|-------------------------------------------|----------------|-----------------------------------------------------------------|-------------------------------------------|----------------|---------------------------------------------|-------------------------------------------|----------------|
|                                            | Fit<br>(17.3%; <sup>c</sup> n=122/706)     |                                          |                | Intermediate<br>(38.1%; <sup>c</sup> n=269/706) |                                           |                | Total–non-frail <sup>b</sup><br>(55.4%; <sup>c</sup> n=391/706) |                                           |                | Frail<br>(44.6%; <sup>c</sup> n=315/706)    |                                           |                |
|                                            | D-VMP<br>(13.7%; <sup>d</sup><br>n=48/350) | VMP<br>(20.8%; <sup>e</sup><br>n=74/356) | <i>P</i> value | D-VMP<br>(39.7%; <sup>d</sup><br>n=139/350)     | VMP<br>(36.5%; <sup>e</sup><br>n=130/356) | <i>P</i> value | D-VMP<br>(53.4%; <sup>d</sup><br>n=187/350)                     | VMP<br>(57.3%; <sup>e</sup><br>n=204/356) | <i>P</i> value | D-VMP<br>(46.6%; <sup>d</sup><br>n=163/350) | VMP<br>(42.7%; <sup>e</sup><br>n=152/356) | <i>P</i> value |
| ORR, n (%)                                 | 46 (95.8)                                  | 59 (79.7)                                | 0.0125         | 128 (92.1)                                      | 94 (72.3)                                 | <0.0001        | 174 (93.0)                                                      | 153 (75.0)                                | <0.0001        | 144 (88.3)                                  | 110 (72.4)                                | 0.0003         |
| ≥CR                                        | 25 (52.1)                                  | 23 (31.1)                                | 0.0209         | 63 (45.3)                                       | 31 (23.8)                                 | 0.0002         | 88 (47.1)                                                       | 54 (26.5)                                 | <0.0001        | 72 (44.2)                                   | 36 (23.7)                                 | 0.0001         |
| sCR                                        | 16 (33.3)                                  | 7 (9.5)                                  | 0.0010         | 33 (23.7)                                       | 6 (4.6)                                   | <0.0001        | 49 (26.2)                                                       | 13 (6.4)                                  | <0.0001        | 32 (19.6)                                   | 15 (9.9)                                  | 0.0152         |
| CR                                         | 9 (18.8)                                   | 16 (21.6)                                |                | 30 (21.6)                                       | 25 (19.2)                                 |                | 39 (20.9)                                                       | 41 (20.1)                                 |                | 40 (24.5)                                   | 21 (13.8)                                 |                |
| ≥VGPR                                      | 34 (70.8)                                  | 46 (62.2)                                | 0.3267         | 104 (74.8)                                      | 60 (46.2)                                 | <0.0001        | 138 (73.8)                                                      | 106 (52.0)                                | <0.0001        | 117 (71.8)                                  | 71 (46.7)                                 | <0.0001        |
| VGPR                                       | 9 (18.8)                                   | 23 (31.1)                                |                | 41 (29.5)                                       | 29 (22.3)                                 |                | 50 (26.7)                                                       | 52 (25.5)                                 |                | 45 (27.6)                                   | 35 (23.0)                                 |                |
| PR                                         | 12 (25.0)                                  | 13 (17.6)                                |                | 24 (17.3)                                       | 34 (26.2)                                 |                | 36 (19.3)                                                       | 47 (23.0)                                 |                | 27 (16.6)                                   | 39 (25.7)                                 |                |
| SD, n (%)                                  | 2 (4.2)                                    | 14 (18.9)                                |                | 7 (5.0)                                         | 27 (20.8)                                 |                | 9 (4.8)                                                         | 41 (20.1)                                 |                | 11 (6.7)                                    | 35 (23.0)                                 |                |
| PD, n (%)                                  | 0                                          | 0                                        |                | 0                                               | 1 (0.8)                                   |                | 0                                                               | 1 (0.5)                                   |                | 0                                           | 1 (0.7)                                   |                |
| NE, n (%)                                  | 0                                          | 1 (1.4)                                  |                | 4 (2.9)                                         | 8 (6.2)                                   |                | 4 (2.1)                                                         | 9 (4.4)                                   |                | 8 (4.9)                                     | 6 (3.9)                                   |                |
| MRD-negative<br>(10 <sup>-5</sup> ), n (%) | 12 (25.0)                                  | 6 (8.1)                                  | 0.0170         | 40 (28.8)                                       | 7 (5.4)                                   | <0.0001        | 52 (27.8)                                                       | 13 (6.4)                                  | <0.0001        | 47 (28.8)                                   | 12 (7.9)                                  | <0.0001        |

CR = complete response; D-VMP = daratumumab plus bortezomib/melphalan/prednisone; ITT = intent-to-treat; MRD = minimal residual disease; NE = not evaluable; ORR = overall response rate; PD = progressive disease; PR = partial response; sCR = stringent complete response; SD = stable disease; VGPR = very good partial response; VMP = bortezomib/melphalan/prednisone.

<sup>a</sup>Percentages in the table were calculated using the number of patients in each treatment cohort per frailty subgroup of the ITT population (fit: D-VMP, n=48; VMP, n=74; intermediate: D-VMP, n=139; VMP, n=130; total–non-frail: D-VMP, n=187; VMP, n=204; frail: D-VMP, n=163; VMP, n=152) as the denominator, unless otherwise indicated.

<sup>b</sup>Non-frail subgroup consists of fit and intermediate patients.

<sup>c</sup>Percentage was calculated using the number of patients in the ITT population as the denominator.

<sup>d</sup>Percentage was calculated using the number of patients in the D-VMP cohort of the ITT population as the denominator.

<sup>e</sup>Percentage was calculated using the number of patients in the VMP cohort of the ITT population as the denominator.

Supplementary Table 5. Grade 3/4 TEAEs and TEAEs With Outcome of Death (>1 Patient) (Safety Population)<sup>a</sup>

|                                                     | Non-frail <sup>b</sup>                     |                                          |                                                 |                                           |                                                                 |                                           | Frail                                       |                                           |
|-----------------------------------------------------|--------------------------------------------|------------------------------------------|-------------------------------------------------|-------------------------------------------|-----------------------------------------------------------------|-------------------------------------------|---------------------------------------------|-------------------------------------------|
|                                                     | Fit<br>(17.4%; <sup>c</sup> n=122/700)     |                                          | Intermediate<br>(38.1%; <sup>c</sup> n=267/700) |                                           | Total–non-frail <sup>b</sup><br>(55.6%; <sup>c</sup> n=389/700) |                                           | Frail<br>(44.4%; <sup>c</sup> n=311/700)    |                                           |
|                                                     | D-VMP<br>(13.9%; <sup>d</sup><br>n=48/346) | VMP<br>(20.9%; <sup>e</sup><br>n=74/354) | D-VMP<br>(39.9%; <sup>d</sup><br>n=138/346)     | VMP<br>(36.4%; <sup>e</sup><br>n=129/354) | D-VMP<br>(53.8%; <sup>d</sup><br>n=186/346)                     | VMP<br>(57.3%; <sup>e</sup><br>n=203/354) | D-VMP<br>(46.2%; <sup>d</sup><br>n=160/346) | VMP<br>(42.7%; <sup>e</sup><br>n=151/354) |
| Total number of patients with grade 3/4 TEAE, n (%) | 35 (72.9)                                  | 57 (77.0)                                | 115 (83.3)                                      | 94 (72.9)                                 | 150 (80.6)                                                      | 151 (74.4)                                | 127 (79.4)                                  | 123 (81.5)                                |
| Haematologic, n (%)                                 |                                            |                                          |                                                 |                                           |                                                                 |                                           |                                             |                                           |
| Neutropenia                                         | 27 (56.3)                                  | 35 (47.3)                                | 46 (33.3)                                       | 51 (39.5)                                 | 73 (39.2)                                                       | 86 (42.4)                                 | 66 (41.3)                                   | 52 (34.4)                                 |
| Thrombocytopenia                                    | 13 (27.1)                                  | 31 (41.9)                                | 48 (34.8)                                       | 44 (34.1)                                 | 61 (32.8)                                                       | 75 (36.9)                                 | 59 (36.9)                                   | 59 (39.1)                                 |
| Lymphopenia                                         | 6 (12.5)                                   | 2 (2.7)                                  | 7 (5.1)                                         | 7 (5.4)                                   | 13 (7.0)                                                        | 9 (4.4)                                   | 14 (8.8)                                    | 13 (8.6)                                  |
| Anaemia                                             | 5 (10.4)                                   | 14 (18.9)                                | 21 (15.2)                                       | 24 (18.6)                                 | 26 (14.0)                                                       | 38 (18.7)                                 | 34 (21.3)                                   | 32 (21.2)                                 |
| Leukopenia                                          | 5 (10.4)                                   | 4 (5.4)                                  | 10 (7.2)                                        | 8 (6.2)                                   | 15 (8.1)                                                        | 12 (5.9)                                  | 13 (8.1)                                    | 18 (11.9)                                 |
| Febrile neutropenia                                 | 1 (2.1)                                    | 3 (4.1)                                  | 2 (1.4)                                         | 2 (1.6)                                   | 3 (1.6)                                                         | 5 (2.5)                                   | 1 (0.6)                                     | 3 (2.0)                                   |
| Non-haematologic, n (%)                             |                                            |                                          |                                                 |                                           |                                                                 |                                           |                                             |                                           |
| Infections                                          | 6 (12.5)                                   | 11 (14.9)                                | 38 (27.5)                                       | 15 (11.6)                                 | 44 (23.7)                                                       | 26 (12.8)                                 | 48 (30.0)                                   | 27 (17.9)                                 |
| Pneumonia                                           | 2 (4.2)                                    | 1 (1.4)                                  | 20 (14.5)                                       | 6 (4.7)                                   | 22 (11.8)                                                       | 7 (3.4)                                   | 23 (14.4)                                   | 8 (5.3)                                   |
| Influenza                                           | 1 (2.1)                                    | 0                                        | 1 (0.7)                                         | 1 (0.8)                                   | 2 (1.1)                                                         | 1 (0.5)                                   | 2 (1.3)                                     | 1 (0.7)                                   |
| Lower respiratory tract infection                   | 1 (2.1)                                    | 1 (1.4)                                  | 0                                               | 1 (0.8)                                   | 1 (0.5)                                                         | 2 (1.0)                                   | 5 (3.1)                                     | 2 (1.3)                                   |
| Bronchitis                                          | 0                                          | 0                                        | 5 (3.6)                                         | 2 (1.6)                                   | 5 (2.7)                                                         | 2 (1.0)                                   | 5 (3.1)                                     | 1 (0.7)                                   |
| Urinary tract infection                             | 0                                          | 0                                        | 4 (2.9)                                         | 0                                         | 4 (2.2)                                                         | 0                                         | 3 (1.9)                                     | 1 (0.7)                                   |

|                                   |         |         |         |         |         |         |          |         |
|-----------------------------------|---------|---------|---------|---------|---------|---------|----------|---------|
| Upper respiratory tract infection | 0       | 1 (1.4) | 3 (2.2) | 2 (1.6) | 3 (1.6) | 3 (1.5) | 5 (3.1)  | 3 (2.0) |
| Sepsis                            | 0       | 3 (4.1) | 2 (1.4) | 1 (0.8) | 2 (1.1) | 4 (2.0) | 2 (1.3)  | 1 (0.7) |
| Infection                         | 0       | 0       | 2 (1.4) | 0       | 2 (1.1) | 0       | 1 (0.6)  | 1 (0.7) |
| Herpes zoster                     | 0       | 0       | 2 (1.4) | 1 (0.8) | 2 (1.1) | 1 (0.5) | 0        | 2 (1.3) |
| Cytomegalovirus infection         | 0       | 0       | 1 (0.7) | 0       | 1 (0.5) | 0       | 2 (1.3)  | 0       |
| Cystitis                          | 0       | 0       | 0       | 0       | 0       | 0       | 2 (1.3)  | 0       |
| Viral pneumonia                   | 0       | 0       | 0       | 0       | 0       | 0       | 2 (1.3)  | 0       |
| Respiratory tract infection       | 0       | 0       | 0       | 0       | 0       | 0       | 2 (1.3)  | 0       |
| Septic shock                      | 0       | 0       | 0       | 1 (0.8) | 0       | 1 (0.5) | 1 (0.6)  | 2 (1.3) |
| Clostridium difficile infection   | 0       | 0       | 0       | 0       | 0       | 0       | 0        | 2 (1.3) |
| Hypertension                      | 3 (6.3) | 1 (1.4) | 6 (4.3) | 3 (2.3) | 9 (4.8) | 4 (2.0) | 10 (6.3) | 2 (1.3) |
| Cataract                          | 2 (4.2) | 0       | 2 (1.4) | 0       | 4 (2.2) | 0       | 3 (1.9)  | 0       |
| Hyponatraemia                     | 2 (4.2) | 0       | 1 (0.7) | 4 (3.1) | 3 (1.6) | 4 (2.0) | 4 (2.5)  | 5 (3.3) |
| Spinal compression fracture       | 2 (4.2) | 0       | 1 (0.7) | 1 (0.8) | 3 (1.6) | 1 (0.5) | 1 (0.6)  | 1 (0.7) |
| Back pain                         | 1 (2.1) | 0       | 4 (2.9) | 2 (1.6) | 5 (2.7) | 2 (1.0) | 2 (1.3)  | 2 (1.3) |
| Atrial fibrillation               | 1 (2.1) | 0       | 3 (2.2) | 2 (1.6) | 4 (2.2) | 2 (1.0) | 3 (1.9)  | 1 (0.7) |
| Hypokalaemia                      | 1 (2.1) | 0       | 3 (2.2) | 0       | 4 (2.2) | 0       | 3 (1.9)  | 6 (4.0) |
| Peripheral sensory neuropathy     | 1 (2.1) | 2 (2.7) | 3 (2.2) | 4 (3.1) | 4 (2.2) | 6 (3.0) | 1 (0.6)  | 8 (5.3) |
| Acute myocardial infarction       | 1 (2.1) | 0       | 1 (0.7) | 0       | 2 (1.1) | 0       | 2 (1.3)  | 0       |
| Constipation                      | 1 (2.1) | 0       | 1 (0.7) | 1 (0.8) | 2 (1.1) | 1 (0.5) | 1 (0.6)  | 0       |
| Orthostatic hypotension           | 1 (2.1) | 0       | 1 (0.7) | 0       | 2 (1.1) | 0       | 0        | 0       |



|                                            |         |         |         |         |         |         |         |         |
|--------------------------------------------|---------|---------|---------|---------|---------|---------|---------|---------|
| Diabetes mellitus                          | 1 (2.1) | 0       | 1 (0.7) | 0       | 2 (1.1) | 0       | 0       | 0       |
| Asthenia                                   | 1 (2.1) | 2 (2.7) | 0       | 3 (2.3) | 1 (0.5) | 5 (2.5) | 4 (2.5) | 2 (1.3) |
| Vomiting                                   | 1 (2.1) | 1 (1.4) | 0       | 1 (0.8) | 1 (0.5) | 2 (1.0) | 4 (2.5) | 4 (2.6) |
| Nausea                                     | 1 (2.1) | 1 (1.4) | 0       | 1 (0.8) | 1 (0.5) | 2 (1.0) | 2 (1.3) | 2 (1.3) |
| Blood alkaline<br>phosphatase increased    | 1 (2.1) | 0       | 0       | 2 (1.6) | 1 (0.5) | 2 (1.0) | 0       | 3 (2.0) |
| Fatigue                                    | 0       | 2 (2.7) | 6 (4.3) | 2 (1.6) | 6 (3.2) | 4 (2.0) | 6 (3.8) | 5 (3.3) |
| Diarrhea                                   | 0       | 2 (2.7) | 5 (3.6) | 3 (2.3) | 5 (2.7) | 5 (2.5) | 4 (2.5) | 6 (4.0) |
| Alanine<br>aminotransferase<br>increased   | 0       | 1 (1.4) | 5 (3.6) | 0       | 5 (2.7) | 1 (0.5) | 3 (1.9) | 4 (2.6) |
| Aspartate<br>aminotransferase<br>increased | 0       | 1 (1.4) | 5 (3.6) | 0       | 5 (2.7) | 1 (0.5) | 2 (1.3) | 3 (2.0) |
| Hyperglycaemia                             | 0       | 4 (5.4) | 4 (2.9) | 2 (1.6) | 4 (2.2) | 6 (3.0) | 7 (4.4) | 2 (1.3) |
| Dyspnea                                    | 0       | 0       | 4 (2.9) | 0       | 4 (2.2) | 0       | 5 (3.1) | 3 (2.0) |
| Hyperkalemia                               | 0       | 0       | 4 (2.9) | 0       | 4 (2.2) | 0       | 3 (1.9) | 3 (2.0) |
| Syncope                                    | 0       | 1 (1.4) | 3 (2.2) | 0       | 3 (1.6) | 1 (0.5) | 7 (4.4) | 0       |
| Hypocalcemia                               | 0       | 1 (1.4) | 3 (2.2) | 1 (0.8) | 3 (1.6) | 2 (1.0) | 5 (3.1) | 6 (4.0) |
| Peripheral<br>sensorimotor<br>neuropathy   | 0       | 1 (1.4) | 2 (1.4) | 0       | 2 (1.1) | 1 (0.5) | 2 (1.3) | 2 (1.3) |
| Gamma-<br>glutamyltransferase<br>increased | 0       | 0       | 2 (1.4) | 1 (0.8) | 2 (1.1) | 1 (0.5) | 2 (1.3) | 2 (1.3) |
| Pulmonary edema                            | 0       | 0       | 2 (1.4) | 1 (0.8) | 2 (1.1) | 1 (0.5) | 2 (1.3) | 0       |
| Femur fracture                             | 0       | 0       | 2 (1.4) | 0       | 2 (1.1) | 0       | 2 (1.3) | 2 (1.3) |
| C-reactive protein<br>increased            | 0       | 2 (2.7) | 2 (1.4) | 0       | 2 (1.1) | 2 (1.0) | 1 (0.6) | 0       |

|                                       |   |         |         |         |         |         |         |         |
|---------------------------------------|---|---------|---------|---------|---------|---------|---------|---------|
| Hyperhidrosis                         | 0 | 0       | 2 (1.4) | 0       | 2 (1.1) | 0       | 0       | 0       |
| Bone pain                             | 0 | 0       | 1 (0.7) | 0       | 1 (0.5) | 0       | 3 (1.9) | 0       |
| Hypoxia                               | 0 | 0       | 1 (0.7) | 0       | 1 (0.5) | 0       | 3 (1.9) | 0       |
| Acute kidney injury                   | 0 | 1 (1.4) | 1 (0.7) | 3 (2.3) | 1 (0.5) | 4 (2.0) | 2 (1.3) | 1 (0.7) |
| Dehydration                           | 0 | 1 (1.4) | 1 (0.7) | 1 (0.8) | 1 (0.5) | 2 (1.0) | 2 (1.3) | 3 (2.0) |
| Bronchospasm                          | 0 | 0       | 1 (0.7) | 0       | 1 (0.5) | 0       | 2 (1.3) | 1 (0.7) |
| Peripheral edema                      | 0 | 0       | 1 (0.7) | 0       | 1 (0.5) | 0       | 2 (1.3) | 1 (0.7) |
| Chronic obstructive pulmonary disease | 0 | 0       | 1 (0.7) | 0       | 1 (0.5) | 0       | 2 (1.3) | 0       |
| Pyrexia                               | 0 | 0       | 1 (0.7) | 0       | 1 (0.5) | 0       | 1 (0.6) | 2 (1.3) |
| Generalized rash                      | 0 | 3 (4.1) | 1 (0.7) | 0       | 1 (0.5) | 3 (1.5) | 0       | 0       |
| Cardiac failure                       | 0 | 1 (1.4) | 0       | 0       | 0       | 1 (0.5) | 3 (1.9) | 3 (2.0) |
| Renal failure                         | 0 | 0       | 0       | 1 (0.8) | 0       | 1 (0.5) | 3 (1.9) | 1 (0.7) |
| Ischemic stroke                       | 0 | 0       | 0       | 0       | 0       | 0       | 3 (1.9) | 0       |
| Hypotension                           | 0 | 0       | 0       | 0       | 0       | 0       | 2 (1.3) | 2 (1.3) |
| Decreased appetite                    | 0 | 0       | 0       | 0       | 0       | 0       | 2 (1.3) | 1 (0.7) |
| Acute respiratory failure             | 0 | 1 (1.4) | 0       | 0       | 0       | 1 (0.5) | 2 (1.3) | 0       |
| Hyperthermia                          | 0 | 0       | 0       | 1 (0.8) | 0       | 1 (0.5) | 2 (1.3) | 0       |
| Oxygen saturation decreased           | 0 | 0       | 0       | 0       | 0       | 0       | 2 (1.3) | 0       |
| Chronic cardiac failure               | 0 | 0       | 0       | 0       | 0       | 0       | 2 (1.3) | 0       |
| Muscular weakness                     | 0 | 0       | 0       | 0       | 0       | 0       | 1 (0.6) | 3 (2.0) |
| Insomnia                              | 0 | 0       | 0       | 0       | 0       | 0       | 1 (0.6) | 2 (1.3) |
| Pulmonary embolism                    | 0 | 1 (1.4) | 0       | 1 (0.8) | 0       | 2 (1.0) | 1 (0.6) | 1 (0.7) |
| Toxic skin eruption                   | 0 | 1 (1.4) | 0       | 1 (0.8) | 0       | 2 (1.0) | 0       | 0       |
| Humerus fracture                      | 0 | 0       | 0       | 0       | 0       | 0       | 0       | 2 (1.3) |

|                                                                   |   |         |         |         |         |         |           |          |
|-------------------------------------------------------------------|---|---------|---------|---------|---------|---------|-----------|----------|
| Total number of patients with a TEAE with outcome of death, n (%) | 0 | 2 (2.7) | 7 (5.1) | 5 (3.9) | 7 (3.8) | 7 (3.4) | 17 (10.6) | 13 (8.6) |
| Cardiac arrest                                                    | 0 | 0       | 1 (0.7) | 0       | 1 (0.5) | 0       | 0         | 2 (1.3)  |
| Death                                                             | 0 | 0       | 0       | 0       | 0       | 0       | 2 (1.3)   | 2 (1.3)  |
| Pneumonia                                                         | 0 | 0       | 0       | 0       | 0       | 0       | 2 (1.3)   | 0        |

D-VMP = daratumumab plus bortezomib/melphalan/prednisone; TEAE = treatment-emergent adverse event; VMP = bortezomib/melphalan/prednisone.

<sup>a</sup> Percentages in the table were calculated using the number of patients in each treatment cohort per frailty subgroup of the safety population (fit: D-VMP, n=48; VMP, n=74; intermediate: D-VMP, n=138; VMP, n=129; total–non-frail: D-VMP, n=186; VMP, n=203; frail: D-VMP; n=160; VMP, n=151) as the denominator, unless otherwise indicated.

<sup>b</sup>Non-frail subgroup consists of fit and intermediate patients.

<sup>c</sup>Percentage was calculated using the number of patients in the safety population as the denominator.

<sup>d</sup>Percentage was calculated using the number of patients in the D-VMP cohort of the safety population as the denominator.

<sup>e</sup>Percentage was calculated using the number of patients in the VMP cohort of the safety population as the denominator.

**Supplementary Table 6. Most Common (≥4% of Patients) Serious TEAEs (Safety D-**

|                                                   | Non-frail <sup>b</sup>                     |                                          |                                                 |                                           |                                                                 |                                           | Frail                                       |                                           |
|---------------------------------------------------|--------------------------------------------|------------------------------------------|-------------------------------------------------|-------------------------------------------|-----------------------------------------------------------------|-------------------------------------------|---------------------------------------------|-------------------------------------------|
|                                                   | Fit<br>(17.4%; <sup>c</sup> n=122/700)     |                                          | Intermediate<br>(38.1%; <sup>c</sup> n=267/700) |                                           | Total–non-frail <sup>b</sup><br>(55.6%; <sup>c</sup> n=389/700) |                                           | Frail<br>(44.4%; <sup>c</sup> n=311/700)    |                                           |
|                                                   | D-VMP<br>(13.9%; <sup>d</sup><br>n=48/346) | VMP<br>(20.9%; <sup>e</sup><br>n=74/354) | D-VMP<br>(39.9%; <sup>d</sup><br>n=138/346)     | VMP<br>(36.4%; <sup>e</sup><br>n=129/354) | D-VMP<br>(53.8%; <sup>d</sup><br>n=186/346)                     | VMP<br>(57.3%; <sup>e</sup><br>n=203/354) | D-VMP<br>(46.2%; <sup>d</sup><br>n=160/346) | VMP<br>(42.7%; <sup>e</sup><br>n=151/354) |
| Total number of patients with serious TEAE, n (%) | 14 (29.2)                                  | 19 (25.7)                                | 66 (47.8)                                       | 38 (29.5)                                 | 80 (43.0)                                                       | 57 (28.1)                                 | 86 (53.8)                                   | 60 (39.7)                                 |
| Serious TEAE, n (%)                               |                                            |                                          |                                                 |                                           |                                                                 |                                           |                                             |                                           |
| Infections                                        | 7 (14.6)                                   | 12 (16.2)                                | 37 (26.8)                                       | 14 (10.9)                                 | 44 (23.7)                                                       | 26 (12.8)                                 | 44 (27.5)                                   | 17 (11.3)                                 |
| Pneumonia                                         | 2 (4.2)                                    | 1 (1.4)                                  | 20 (14.5)                                       | 6 (4.7)                                   | 22 (11.8)                                                       | 7 (3.4)                                   | 19 (11.9)                                   | 5 (3.3)                                   |
| Lower respiratory tract infection                 | 1 (2.1)                                    | 1 (1.4)                                  | 2 (1.4)                                         | 1 (0.8)                                   | 3 (1.6)                                                         | 2 (1.0)                                   | 7 (4.4)                                     | 1 (0.7)                                   |
| Sepsis                                            | 0                                          | 3 (4.1)                                  | 3 (2.2)                                         | 1 (0.8)                                   | 3 (1.6)                                                         | 4 (2.0)                                   | 2 (1.3)                                     | 1 (0.7)                                   |
| Spinal compression fracture                       | 2 (4.2)                                    | 0                                        | 1 (0.7)                                         | 0                                         | 3 (1.6)                                                         | 0                                         | 1 (0.6)                                     | 1 (0.7)                                   |
| Cardiac failure                                   | 0                                          | 1 (1.4)                                  | 0                                               | 1 (0.8)                                   | 0                                                               | 2 (1.0)                                   | 2 (1.3)                                     | 6 (4.0)                                   |

D-VMP = daratumumab plus bortezomib/melphalan/prednisone; TEAE = treatment-emergent adverse event; VMP = bortezomib/melphalan/prednisone.

<sup>a</sup>Percentages in the table were calculated using the number of patients in each treatment cohort per frailty subgroup of the safety population (fit: D-VMP, n=48; VMP, n=74; intermediate: D-VMP, n=138; VMP, n=129; total–non-frail: D-VMP, n=186; VMP, n=203; frail: D-VMP, n=160; VMP, n=151) as the denominator, unless otherwise indicated.

<sup>b</sup>Non-frail subgroup consists of fit and intermediate patients.

<sup>c</sup>Percentage was calculated using the number of patients in the safety population as the denominator.

<sup>d</sup>Percentage was calculated using the number of patients in the D-VMP cohort of the safety population as the denominator.

<sup>e</sup>Percentage was calculated using the number of patients in the VMP cohort of the safety population as the denominator.

**Supplementary Table 7. Most Common TEAEs Leading to Treatment Discontinuation (>1 Patient) (Safety Population)<sup>a</sup>**

|                                                                                  | Non-frail <sup>b</sup>                     |                                          |                                                 |                                           |                                                                 |                                           | Frail                                       |                                           |
|----------------------------------------------------------------------------------|--------------------------------------------|------------------------------------------|-------------------------------------------------|-------------------------------------------|-----------------------------------------------------------------|-------------------------------------------|---------------------------------------------|-------------------------------------------|
|                                                                                  | Fit<br>(17.4%; <sup>c</sup> n=122/700)     |                                          | Intermediate<br>(38.1%; <sup>c</sup> n=267/700) |                                           | Total–non-frail <sup>b</sup><br>(55.6%; <sup>c</sup> n=389/700) |                                           | Frail<br>(44.4%; <sup>c</sup> n=311/700)    |                                           |
|                                                                                  | D-VMP<br>(13.9%; <sup>d</sup><br>n=48/346) | VMP<br>(20.9%; <sup>e</sup><br>n=74/354) | D-VMP<br>(39.9%; <sup>d</sup><br>n=138/346)     | VMP<br>(36.4%; <sup>e</sup><br>n=129/354) | D-VMP<br>(53.8%; <sup>d</sup><br>n=186/346)                     | VMP<br>(57.3%; <sup>e</sup><br>n=203/354) | D-VMP<br>(46.2%; <sup>d</sup><br>n=160/346) | VMP<br>(42.7%; <sup>e</sup><br>n=151/354) |
| Total number of patients with a TEAE leading to treatment discontinuation, n (%) | 1 (2.1)                                    | 6 (8.1)                                  | 9 (6.5)                                         | 8 (6.2)                                   | 10 (5.4)                                                        | 14 (6.9)                                  | 14 (8.8)                                    | 19 (12.6)                                 |
| Non-haematologic, n (%)                                                          |                                            |                                          |                                                 |                                           |                                                                 |                                           |                                             |                                           |
| Fatigue                                                                          | 0                                          | 0                                        | 0                                               | 0                                         | 0                                                               | 0                                         | 1 (0.6)                                     | 2 (1.3)                                   |
| Peripheral sensory neuropathy                                                    | 0                                          | 1 (1.4)                                  | 0                                               | 1 (0.8)                                   | 0                                                               | 2 (1.0)                                   | 0                                           | 4 (2.6)                                   |
| Infections                                                                       | 0                                          | 3 (4.1)                                  | 4 (2.9)                                         | 0                                         | 4 (2.2)                                                         | 3 (1.5)                                   | 2 (1.3)                                     | 3 (2.0)                                   |
| Pneumonia                                                                        | 0                                          | 0                                        | 2 (1.4)                                         | 0                                         | 2 (1.1)                                                         | 0                                         | 1 (0.6)                                     | 1 (0.7)                                   |

D-VMP = daratumumab plus bortezomib/melphalan/prednisone; TEAE = treatment-emergent adverse event; VMP = bortezomib/melphalan/prednisone.

<sup>a</sup>Percentages in the table were calculated using the number of patients in each treatment cohort per frailty subgroup of the safety population (fit: D-VMP, n=48; VMP, n=74; intermediate: D-VMP, n=138; VMP, n=129; total–non-frail: D-VMP, n=186; VMP, n=203; frail: D-VMP; n=160; VMP, n=151) as the denominator, unless otherwise indicated.

<sup>b</sup>Non-frail subgroup consists of fit and intermediate patients.

<sup>c</sup>Percentage was calculated using the number of patients in the safety population as the denominator.

<sup>d</sup>Percentage was calculated using the number of patients in the D-VMP cohort of the safety population as the denominator.

<sup>e</sup>Percentage was calculated using the number of patients in the VMP cohort of the safety population as the denominator.

## Reference

1. Facon T, Dimopoulos MA, Meuleman N, Belch A, Mohty M, Chen WM, et al. A simplified frailty scale predicts outcomes in transplant-ineligible patients with newly diagnosed multiple myeloma treated in the FIRST (MM-020) trial. *Leukemia*. 2020;**34**:224-233.
